# Supplementary material for: Trade vulnerability assessment in the grain-importing countries: A case study of China
Source: PubMed Central journal article supplement (PMC8535458; doi:10.1371/journal.pone.0257987), 2021-10-22
Supplement: pone.0257987.s003.pdf [file pone.0257987.s003.pdf]

**Table1. Grain trade interdependence between China and other countries**

| Classification standard                   | Import dependence                                                                            | Export dependence                                                                                  |
|-------------------------------------------|----------------------------------------------------------------------------------------------|----------------------------------------------------------------------------------------------------|
| Highest dependence<br>( $\geq 15\%$ )     | Australia, the United States, Canada                                                         | Australia, Vietnam                                                                                 |
| Higher dependence<br>( $5\% \sim 15\%$ )  | Vietnam, Ukraine, Thailand                                                                   | Canada, Ukraine, Thailand, Pakistan, Kazakhstan, Myanmar                                           |
| Moderate dependence<br>( $1\% \sim 5\%$ ) | Pakistan, France, Kazakhstan, Myanmar                                                        | America, France, Japan                                                                             |
| Lower dependence<br>( $\leq 1\%$ )        | Russia, Germany, Japan, Argentina, Chile, Denmark, South Korea, India, the Netherlands, etc. | Russia, Chile, Germany, South Korea, Denmark, Philippines, Malaysia, Argentina, Netherlands, India |
