# Supplementary material for: Trade vulnerability assessment in the grain-importing countries: A case study of China
Source: PubMed Central journal article supplement (PMC8535458; doi:10.1371/journal.pone.0257987), 2021-10-22
Supplement: pone.0257987.s004.pdf [file pone.0257987.s004.pdf]

**Table2. Classification for  $V_{ij}$**

| Vulnerability level  | Higher           | Medium       | Lower            |
|----------------------|------------------|--------------|------------------|
| $V_{ij}$ value range | $(1.6, +\infty)$ | $[0.7, 1.6]$ | $(-\infty, 0.7)$ |
