# Supplementary material for: Trade vulnerability assessment in the grain-importing countries: A case study of China
Source: PubMed Central journal article supplement (PMC8535458; doi:10.1371/journal.pone.0257987), 2021-10-22
Supplement: pone.0257987.s005.pdf [file pone.0257987.s005.pdf]

**Table3. Classification for  $S_{ij}$**

|                      |                                 |                                 |                    |                                 |                                 |
|----------------------|---------------------------------|---------------------------------|--------------------|---------------------------------|---------------------------------|
| Sensitivity level    | Negative<br>higher<br>sensitive | Medium<br>negative<br>sensitive | Lower<br>sensitive | Positive<br>medium<br>sensitive | Positive<br>higher<br>sensitive |
| $S_{ij}$ value range | $(-\infty, -5]$                 | $(-5, -1]$                      | $(-1,1)$           | $[1,5)$                         | $[5, +\infty)$                  |
