# Supplementary material for: Trade vulnerability assessment in the grain-importing countries: A case study of China
Source: PubMed Central journal article supplement (PMC8535458; doi:10.1371/journal.pone.0257987), 2021-10-22
Supplement: pone.0257987.s006.pdf [file pone.0257987.s006.pdf]

**Table4. Differences of China's sensitivity to importing countries**

| Sensitivity level             | $S_{ci}$ value range | Countries                                                                                                                                                                                                                                               |
|-------------------------------|----------------------|---------------------------------------------------------------------------------------------------------------------------------------------------------------------------------------------------------------------------------------------------------|
| Negative higher sensitivity   | $\leq -5$            | Russia (- 10.57), Argentina (- 6.88)                                                                                                                                                                                                                    |
| Negative moderate sensitivity | (-5~-1)              | Myanmar (- 3.08), Ukraine (- 2.16)                                                                                                                                                                                                                      |
| Lower sensitivity             | (-1~1)               | Brazil (- 0.58), Vietnam (- 0.36), Kazakhstan (- 0.18), Pakistan (- 0.12), Japan (- 0.06), Thailand (- 0.05), Malaysia (0.01), Philippines (0.02), New Zealand (0.09), Italy (0.35), Austria (0.38), Finland (0.38), Denmark (0.53), Chile (0.55), etc. |
| Positive moderate sensitivity | (1~5)                | Britain (2.62) and Canada (4.87)                                                                                                                                                                                                                        |
| Positive higher sensitivity   | $\geq 5$             | America (5.67), France (5.73), Germany (5.85), India (7.38), and Australia (8.17).                                                                                                                                                                      |
